# Supplementary material
Source: PubMed Central journal article supplement (PMC8989863)
Supplement: 12325_2022_2068_MOESM1_ESM.pdf [file 12325_2022_2068_MOESM1_ESM.pdf]

## **Efficacy and Safety Outcomes with Diroximel Fumarate After Switching from Prior Therapies or Continuing on DRF: Results from the Phase 3 EVOLVE-MS-1 Study**

Sibyl Wray,<sup>1</sup> Florian Then Bergh,<sup>2</sup> Annette Wundes,<sup>3</sup> Douglas L. Arnold,<sup>4,5</sup> Jelena Drulovic,<sup>6</sup> Elzbieta Jasinska,<sup>7</sup> James D. Bowen,<sup>8</sup> Donald Negroski,<sup>9</sup> Robert T. Naismith,<sup>10</sup> Samuel F. Hunter,<sup>11</sup> Mark Gudesblatt,<sup>12</sup> Hailu Chen,<sup>13</sup> Jennifer Lyons,<sup>13</sup> Sai L. Shankar,<sup>13</sup> Shivani Kapadia,<sup>13</sup> Jason P. Mendoza,<sup>13</sup> Barry A. Singer<sup>14</sup>

<sup>1</sup>Hope Neurology MS Center, Knoxville, TN, USA

<sup>2</sup>Department of Neurology, University of Leipzig, Leipzig, Germany

<sup>3</sup>Department of Neurology, University of Washington Medical Center, Seattle, WA, USA

<sup>4</sup>Montreal Neurological Institute, McGill University, Montreal, QC, Canada

<sup>5</sup>NeuroRx Research Inc., Montreal, QC, Canada

<sup>6</sup>Clinic of Neurology, University of Belgrade, Belgrade, Serbia

<sup>7</sup>Collegium Medicum UJK and Clinical Center, RESMEDICA, Kielce, Poland

<sup>8</sup>Multiple Sclerosis Center, Swedish Neuroscience Institute, Seattle, WA, USA

<sup>9</sup>MS Center of Sarasota, Sarasota, FL, USA

<sup>10</sup>Washington University School of Medicine, St. Louis, MO, USA

<sup>11</sup>Advanced Neurosciences Institute, Franklin, TN, USA

<sup>12</sup>South Shore Neurologic Associates, Patchogue, NY, USA

<sup>13</sup>Biogen, Cambridge, MA, USA

<sup>14</sup>The MS Center for Innovations in Care, Missouri Baptist Medical Center, St. Louis, MO, USA

**Corresponding author:** Jason Mendoza, 225 Binney St, Cambridge, MA 02142; email: [jason.mendoza@biogen.com](mailto:jason.mendoza@biogen.com)

## SUPPLEMENTARY MATERIAL

**Supp. Fig. 1** Mean plasma MMF concentration over time following dosing of DRF or DMF. A single oral dose of DRF 462 mg or DMF 240 mg was administered to healthy adults, ages 18 to 55 years, while fasting. MMF was quantified in serum samples collected for pharmacokinetic evaluation following administration of study drug predose and at 0.25, 0.5, 1, 1.5, 2, 2.5, 3, 4, 6, 8, 12, 24, 36, 48, 60, and 72 hours postdose. Mean absorption lag time was 1 hour for both treatments. For DRF and DMF, the median time to maximal concentration was 2.5 and 3.0 hours, respectively. Mean MMF concentrations were less than the lower limit of quantification by 8 hours postdose for both treatments. [1]

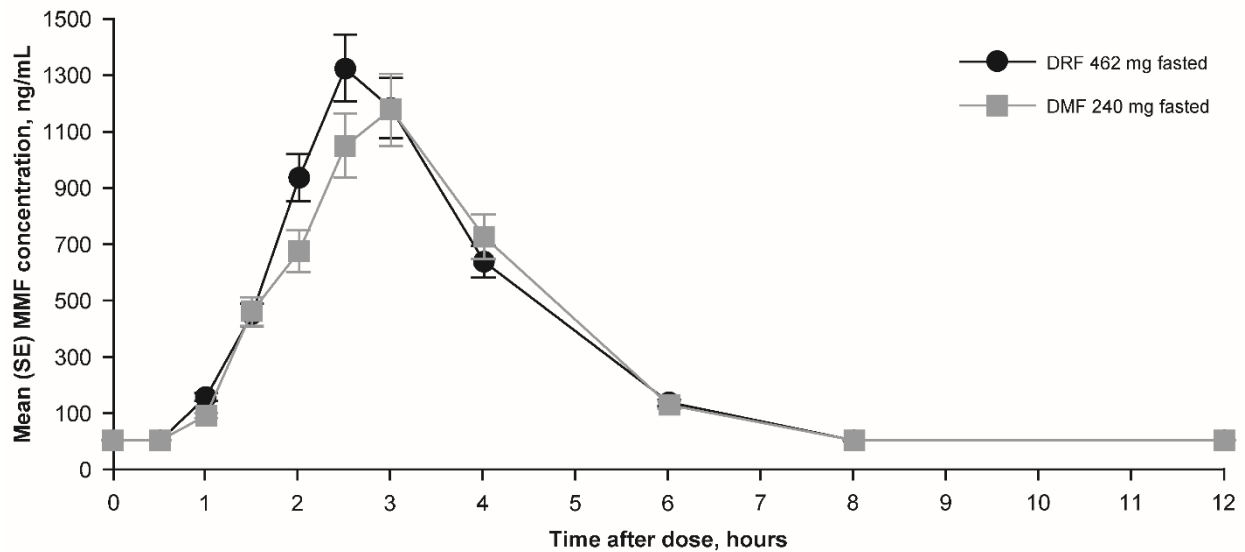

*DMF* dimethyl fumarate; *DRF* diroximel fumarate; *MMF* monomethyl fumarate

Reproduced from Naismith RT et al., *Mult Scler.* 2020 [1]

**Supp. Table 1.** List of IRBs and Ethics Committees

| <b>Center name</b>                                                                                    | <b>Address</b>                                                           |
|-------------------------------------------------------------------------------------------------------|--------------------------------------------------------------------------|
| <b>Central IRB</b>                                                                                    |                                                                          |
| Copernicus Group IRB                                                                                  | One Triangle Drive Suite 100 Durham, NC 27713                            |
| <b>Individual IRBs</b>                                                                                |                                                                          |
| Copernicus Group IRB                                                                                  | One Triangle Drive Suite 100 Durham, NC 27713                            |
| The Ottawa Health Science Network Research Ethics Board                                               | 725 Parkdale Avenue, Ottawa, Ontario, Canada K1Y 4E9                     |
| Western IRB                                                                                           | 1019 39th Avenue SE Suite 120<br>Puyallup, WA 98374                      |
| Saint Louis University Institutional Review Board                                                     | 3556 Caroline St.<br>St. Louis, MO 63104                                 |
| Indiana University Institutional Review Board                                                         | 980 Indiana Avenue, Lockefield, Room 3315,<br>Indianapolis, IN 36202     |
| Providence Health & Services Institutional Review Board                                               | 5251 NE Glisan Street Portland, OR 97213                                 |
| The Washington University in St. Louis Institutional Review Board                                     | 660 South Euclid Ave., CB 8089 St. Louis, MO<br>63110                    |
| Committee for the Protection of Human Subjects                                                        | 6410 Fannin St., Suite 1100, Houston, TX 77030                           |
| Sutter Health Institutional Review Board                                                              | 2121 N. California Blvd. Walnut Creek, CA 94596                          |
| Georgetown University Institutional Review Board                                                      | 3900 Reservoir Rd NW Washington, DC 20057                                |
| Chesapeake IRB                                                                                        | 6940 Columbia Gateway Drive, Suite 110,<br>Columbia, MD 21046            |
| Wake Forest University Health Sciences Institutional Review                                           | Board Medical Center Boulevard, Winston-Salem,<br>NC 27157               |
| Loma Linda University Adventist Health Sciences Center IRB<br>Research Protection Programs            | 24887 Taylor Street, Suite 202 Loma Linda, CA<br>92350                   |
| BioMed IRB                                                                                            | P.O. Box 600870, San Diego, CA 92160                                     |
| Mercy Medical Center Des Moines Institutional Review Board                                            | 1111 6th Ave., Des Moines, IA 50314                                      |
| UNM Human Research Protections Office                                                                 | 1 University of New Mexico, MSC:08- 4560,<br>Albuquerque, NM 87131       |
| Upstate Medical University Institutional Review Board                                                 | Weiskotten Hall, Rm. 1109 Syracuse, NY 13210                             |
| Henry Ford Health System Research Administration, IRB                                                 | One Ford Place, Suite 2-F Detroit, MI 48202                              |
| OMRF IRB                                                                                              | 825 NE 13th Street Oklahoma City, OK 73104                               |
| Ethisch Comité AZ Sint-Jan Brugge- Oostende                                                           | Ruddershove 10 Brugge Belgium<br>8000                                    |
| Ethics Committee for Multicenter Trials                                                               | 8, Damyan Gruev Str. Sofia, Bulgaria 1303                                |
| Ethik-Kommission der Landesärztekammer Baden- Württemberg                                             | Jahnstraße 40 Stuttgart Germany 70597                                    |
| Ethikkommission Technische Universität Dresden                                                        | Fetscherstraße 74 Dresden Germany 01307                                  |
| Ethik-Kommission der Ärztekammer Niedersachsen                                                        | Berliner Allee 20 Hannover Germany 30175                                 |
| Ethik-Kommission an der Medizinischen Fakultät der Universität<br>Leipzig Haus: Karl-Sudhoff-Institut | Karl-Sudhoff-Institut Käthe-Kollwitz-Straße 82,<br>Leipzig Germany 04109 |
| Ethikkommission der Universität Ulm                                                                   | Helmholtzstraße 20 (Oberer Eselsberg) Ulm<br>Germany 89081               |

|                                                                                                                                                             |                                                                      |
|-------------------------------------------------------------------------------------------------------------------------------------------------------------|----------------------------------------------------------------------|
| Komisja Bioetyczna przy Uniwersytecie Medycznym w Łodzi                                                                                                     | Plac Hallera 1B Łódź Poland 90-647                                   |
| Independant Ethics Committee of the NRSBHI City Clinical Hospital No. 3                                                                                     | 21, Verkhnevolzhskaya nab. Nizhny Novgorod Russia 603155             |
| Local Ethics Committee of the Federal State Budget Institution Federal Siberian Research Clinical Centre of the Federal Medical Biological Agency of Russia | 26, Kolomenskaya str. Krasnoyarsk Krasnoyarsk's region Russia 660037 |
| CEIC Hospital General Universitario Gregorio Marañón Pabellón de Gobierno                                                                                   | 1ª planta C/ Dr. Esquerdo, 46, Madrid Spain 28007                    |
| Ethics Committee of Communal institution Odesa Regional Clinical Hospital                                                                                   | 26 Zabolotnogo Str. Odesa Ukraine 65000                              |
| Commission on Ethics and Deontology of State Institution Institute of Neurology Psychiatry and Narcology of National Academy of Medical Sciences of Ukraine | 46 Akademika Pavlova str. Kharkiv Ukraine 61068                      |
| Ethics Committee of Lviv Regional Clinical Hospital                                                                                                         | 7 Chernihivska Str. Lviv Ukraine 79000                               |
| The Ethics Committee of Kharkiv Railway Clinical Hospital #1 of Branch "Health Center" of the Public joint stock company "Ukrainian Railway"                | 5 Balakireva lane Kharkiv Ukraine 61103                              |
| Ethics Committee of Communal Institution Zaporizhzhya Regional Clinical Hospital of Zaporizhzhya regional Council                                           | 10 Orekhivske shose Zaporizhzhya Ukraine 69600                       |
| Ethics Committee of Ivano-Frankivsk Regional Clinical Hospital                                                                                              | 91 Fedkovycha Str. Ivano-Frankivsk Ukraine 76000                     |
| Ethics Committee of Communal Institution Zaporizhzhya City Multiple Discipline Clinical Hospital #9                                                         | 1 Shastlyva str. Zaporizhzhya Ukraine 69065                          |
| Ethics Committee of Communal institution Dnipropetrovsk regional clinical hospital after Mechnikov I.I.                                                     | 14 Soborna sq. Dnipro Ukraine 49005                                  |
| Ethics Committee of State Institution Institute of Neurology Psychiatry and Narcology of National Academy of Medical Sciences of Ukraine                    | 46, Akademika Pavlova Str. Kharkiv Ukraine 61068                     |
| Local Ethics Committee of Clinical Center Kragujevac                                                                                                        | Zmaj Jovina 30, Kragujevac, Serbia, 34000                            |
| Local Ethics Committee of Military Medical Academy                                                                                                          | Crnotravska 17, Belgrade, Serbia, 11000                              |
| Local Ethics Committee of Zvezdara University Medical Center                                                                                                | Dimitrija Tucovica 161, Belgrade, Serbia, 11000                      |
| Local Ethics Committee of Clinical Center Nis                                                                                                               | Bulevar dr Zorana Đinđića 48, Nis, Serbia, 18000                     |
| Local Ethics Committee of Clinical Center of Serbia                                                                                                         | Dr. Subotica 6, Belgrade, Serbia, 11000                              |

1. Naismith RT, Wolinsky JS, Wundes A, et al. Droximel fumarate (DRF) in patients with relapsing-remitting multiple sclerosis: Interim safety and efficacy results from the phase 3 EVOLVE-MS-1 study. *Mult Scler.* 2020;26(13):1729-39.
